# Supplementary material for: Identification of CALU and PALLD as Potential Biomarkers Associated With Immune Infiltration in Heart Failure
Source: Front Cardiovasc Med. 2021 Dec 1;8:774755. doi: 10.3389/fcvm.2021.774755 (PMC8671636; doi:10.3389/fcvm.2021.774755)
Supplement: Supplementary file 6 [file Table_2.XLSX]

## Sheet: KEGG
ID	Description	GeneRatio	BgRatio	pvalue	p.adjust	qvalue	geneID	Count
hsa04612	Antigen processing and presentation	8/116	78/8108	1.40254e-05	0.00181939	0.00153685	HSP90AA1/HLA-DPB1/HSPA1A/HSPA1B/CD74/HSPA2/HSPA6/HLA-DPA1	8
hsa04974	Protein digestion and absorption	9/116	103/8108	1.49744e-05	0.00181939	0.00153685	ATP1A1/COL15A1/SLC38A2/COL16A1/COL1A2/COL21A1/COL3A1/ATP1B1/COL1A1	9
hsa05205	Proteoglycans in cancer	12/116	205/8108	3.38407e-05	0.0027411	0.00231542	LUM/MAP2K1/FLNC/CDKN1A/STAT3/THBS1/ITGA5/FZD7/COL1A2/TIMP3/MYC/COL1A1	12
hsa05144	Malaria	6/116	50/8108	7.16429e-05	0.00435231	0.00367641	THBS1/HBB/THBS4/HBA1/HBA2/THBS2	6
hsa04141	Protein processing in endoplasmic reticulum	10/116	171/8108	0.000158943	0.00772463	0.00652502	HSP90AA1/DERL1/ATF4/HSPH1/DNAJB1/BAG2/HSPA1A/HSPA1B/HSPA2/HSPA6	10
hsa04978	Mineral absorption	6/116	60/8108	0.000200955	0.00813868	0.00687478	ATP1A1/SLC30A1/MT1X/MT1M/MT2A/ATP1B1	6
hsa04915	Estrogen signaling pathway	8/116	138/8108	0.000779346	0.0270544	0.022853	HSP90AA1/FKBP5/MAP2K1/ATF4/HSPA1A/HSPA1B/HSPA2/HSPA6	8
hsa04010	MAPK signaling pathway	12/116	294/8108	0.000973921	0.0290331	0.0245244	MAP2K1/FLNC/ATF4/PDGFD/PLA2G4C/HSPB1/MYC/HSPA1A/HSPA1B/DUSP5/HSPA2/HSPA6	12
hsa05145	Toxoplasmosis	7/116	112/8108	0.0010753	0.0290331	0.0245244	STAT3/HLA-DPB1/HSPA1A/HSPA1B/HSPA2/HSPA6/HLA-DPA1	7
hsa05134	Legionellosis	5/116	57/8108	0.00127219	0.0309142	0.0261134	HSPD1/HSPA1A/HSPA1B/HSPA2/HSPA6	5
hsa04145	Phagosome	8/116	152/8108	0.00145888	0.0318534	0.0269067	TUBA3C/TUBA3D/THBS1/ITGA5/THBS4/HLA-DPB1/THBS2/HLA-DPA1	8
hsa04512	ECM-receptor interaction	6/116	88/8108	0.00157301	0.0318534	0.0269067	THBS1/ITGA5/THBS4/COL1A2/THBS2/COL1A1	6
hsa05143	African trypanosomiasis	4/116	37/8108	0.00182505	0.0322474	0.0272396	NPPA/HBB/HBA1/HBA2	4
hsa04213	Longevity regulating pathway - multiple species	5/116	62/8108	0.00185788	0.0322474	0.0272396	IRS2/HSPA1A/HSPA1B/HSPA2/HSPA6	5
hsa04510	Focal adhesion	9/116	201/8108	0.00228594	0.0370323	0.0312814	MAP2K1/FLNC/THBS1/PDGFD/ITGA5/THBS4/COL1A2/THBS2/COL1A1	9
hsa05219	Bladder cancer	4/116	41/8108	0.00267831	0.0406768	0.0343599	MAP2K1/CDKN1A/THBS1/MYC	4
